# Supplementary material for: Identification of an oncogenic network with prognostic and therapeutic value in prostate cancer
Source: PubMed Central journal article supplement (PMC6684952; doi:10.15252/msb.20188202), 2018-08-14
Supplement: MSB-14-e8202-s001.pdf [file MSB-14-e8202-s001.pdf]

# Appendix

## Table of contents

| Page | Appendix Figures | Description                                                                                                                          |
|------|------------------|--------------------------------------------------------------------------------------------------------------------------------------|
| 2    | S1               | Meta-analysis of human gene expression profiling arrays identifies gene modules that correlate with prostate cancer progression.     |
| 3    | S2               | shGFP control samples for the gene expression array are not significantly enriched among WGCNA modules.                              |
| 4    | S3               | The green module was not enriched for full length AR regulated genes.                                                                |
| 5    | S4               | Expression of AR-V7 generated a slight growth defect on the yeast strain.                                                            |
| 6    | S5               | Network analysis of AR-V7 interactome was obtained using STRING of hits identified by SGA screening.                                 |
| 7    | S6               | Pathway analysis of the seven gene set reveals a strong association to cell cycle.                                                   |
| 8    | S7               | The seven genes are co-expressed in human PC samples, but do not correlate with full length AR expression levels.                    |
| 9    | S8               | Elevated expression of the seven gene set is associated with higher Gleason scores and other adverse indicators in human PC samples. |
| 11   | S9               | The seven gene set does not have prognostic value in several other types of cancer.                                                  |
| 12   | S10              | None of the seven genes are regulated by ligand-activated full length AR.                                                            |
| 14   | S11              | The seven gene set is not associated to full length AR levels in human samples.                                                      |
| 15   | S12              | Stable depletion of the expression of each of the seven genes reduces CRPC cell proliferation in two different cell lines.           |
| 16   | S13              | Analysis of efficacy of shRNA-mediated depletion of the expression of each of the seven genes.                                       |
| 17   | S14              | Members of the gene set modify AR-V7 and full length AR expression levels.                                                           |
| 18   | S15              | The compound N-9 affects directly and indirectly four of the seven genes due to pathway interactions.                                |

A

| Dataset Identifier | Array     | Tissue | Number of samples | Reference               |
|--------------------|-----------|--------|-------------------|-------------------------|
| EMEXP1243          | U133plus2 | Human  | 81                | Traka et al., 2008      |
| GSE17951           | U133plus2 | Human  | 154               | Jia et al., 2011        |
| GSE32982           | U133plus2 | Human  | 9                 | Vaarala et al., 2012    |
| GSE3325            | U133plus2 | Human  | 19                | Varambally et al., 2005 |
| GSE45016           | U133plus2 | Human  | 11                | Satake et al., 2010     |
| GSE46602           | U133plus2 | Human  | 50                | Mortensen et al., 2015  |
| GSE55945           | U133plus2 | Human  | 21                | Arredouani et al., 2009 |
| GSE7307            | U133plus2 | Human  | 30                | Rands et al 2013.,      |
| <b>TOTAL</b>       |           |        | <b>375</b>        |                         |

B

| Phenotype                                              | Number of samples |
|--------------------------------------------------------|-------------------|
| Normal Prostate Tissue                                 | 129               |
| Benign Prostatic Hyperplasia (BPH)                     | 25                |
| High-Grade Prostatic Intraepithelial neoplasia (HGPIN) | 76                |
| Cancerous                                              | 120               |
| Castration Resistant Prostate Cancer (CRPC)            | 8                 |
| Metastasis                                             | 17                |
| Patient Age at Biopsy                                  | 118               |
| Gleason Grade                                          | 67                |

C

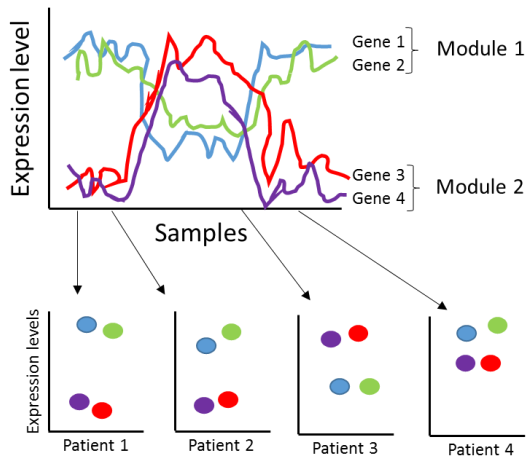

D

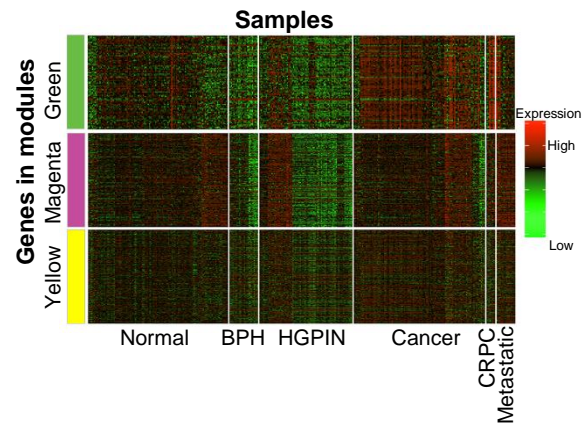

### Appendix Figure S1: Meta-analysis of human gene expression profiling arrays identifies gene modules that correlate with prostate cancer progression.

(A), (B) The tables summarize the eight independent microarrays used for the WGCNA analysis, comprising 375 human prostate samples; and the different prostate phenotypes.

(C) The schematics depict the underlying concept of WGCNA in which gene modules are defined by identifying those genes whose expression changes similarly across different patients.

(D) Heat map depicts gene expression levels of *Green*, *Magenta* and *Yellow* modules, which significantly correlate with disease progression, and their relationships to phenotype/disease stage from WGCNA analysis.

**A**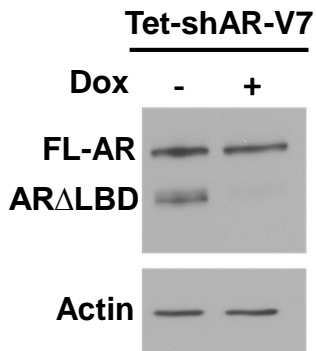**B**

|          |       |         |        |          |        |
|----------|-------|---------|--------|----------|--------|
| APOBEC3B | CCNE2 | CENPM   | KIF11  | NUF2     | TACC3  |
| ASPM     | CDC20 | CEP55   | KIF14  | NUSAP1   | TOP2A  |
| AURKA    | CDCA8 | DEPDC1B | KIF18A | PBK      | TPX2   |
| BIRC5    | CDK1  | DLGAP5  | KIF20A | RACGAP1  | TYMS   |
| BUB1     | CDKN3 | E2F8    | KIF23  | RAD51    | UBE2T  |
| BUB1B    | CDT1  | ECT2    | KIF4A  | RAD51AP1 | UHRF1  |
| CALCOCO1 | CENPE | FAM49B  | MAD2L1 | RFC4     | ZNF367 |
| CASC5    | CENPF | GART    | NCAPG  | RMI1     | ZNF92  |
| CCNB1    | CENPI | GINS1   | NCAPH  | SGOL2    | ZWINT  |
| CCNB2    | CENPK | HMMR    | NDC1   | SPC24    | ZYX    |

**C**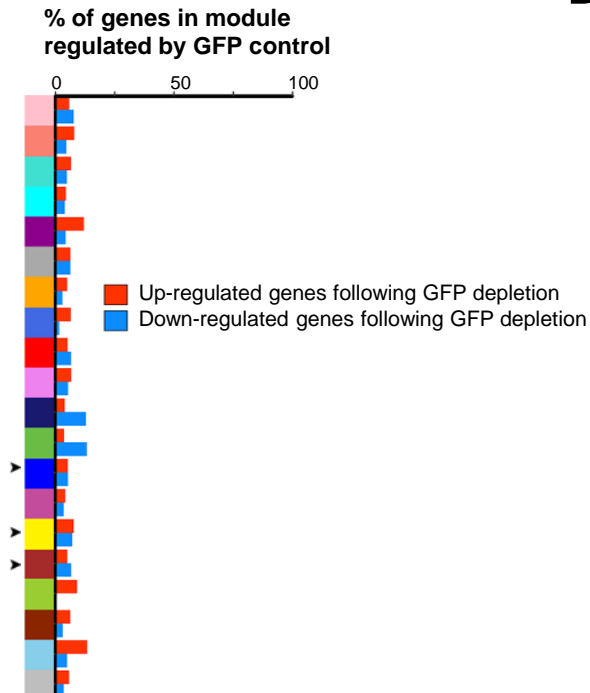**D**

| Rank | Enrichment P | Bonferroni P | Process                      |
|------|--------------|--------------|------------------------------|
| 1    | 2.41E-41     | 3.83E-37     | mitotic cell cycle           |
| 2    | 5.57E-39     | 8.85E-35     | cell cycle                   |
| 3    | 2.12E-37     | 3.36E-33     | cell cycle process           |
| 4    | 2.94E-35     | 4.67E-31     | mitotic cell cycle process   |
| 5    | 1.85E-33     | 2.95E-29     | cell division                |
| 6    | 6.06E-32     | 9.63E-28     | mitotic nuclear division     |
| 7    | 8.23E-28     | 1.31E-23     | chromosome segregation       |
| 8    | 2.95E-22     | 4.69E-18     | sister chromatid segregation |

**Appendix Figure S2: shGFP control samples for the gene expression array are not significantly enriched among WGCNA modules.**

**(A)** 22Rv1 cells stably expressing tet-shAR-V7 were grown in 5% CSS  $\pm$  doxycycline for 72 hours. Equivalent amounts of total cellular protein were immunoblotted for N-terminal AR and actin (AR(N20) Cat. Sc-816 and actin Cat. Sc-47778).

**(B)** List of the 60 genes in the *green* module regulated by AR-V7.

**(C)** Microarray analysis was performed in 22Rv1 PC cells in doxycycline-treated shGFP controls. The genes that were significantly regulated by shGFP (in either direction, p value < 0.05) were distributed among the gene modules defined by WGCNA in Figure 1a. Up-regulated genes are those in which expression increased following GFP depletion. Conversely, downregulated genes are those that decreased following GFP depletion.

**(D)** Results from pathway enrichment analysis of the *green* module is shown.

A

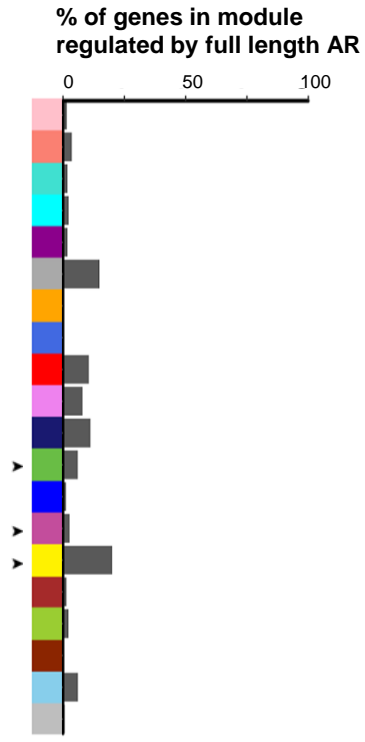

B

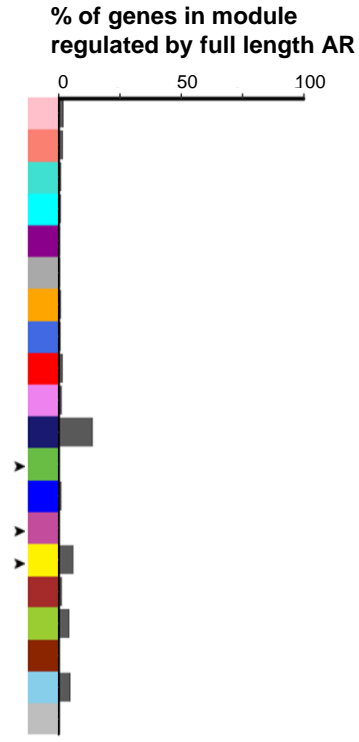

**Appendix Figure S3: The green module was not enriched for full length AR regulated genes.**

(A), (B) Full length AR signatures were obtained from Pomerantz et al., 2015, and Mendiratta et al., 2009. The list of full length AR regulated genes were distributed among the gene modules defined by WGCNA in Figure 1a.

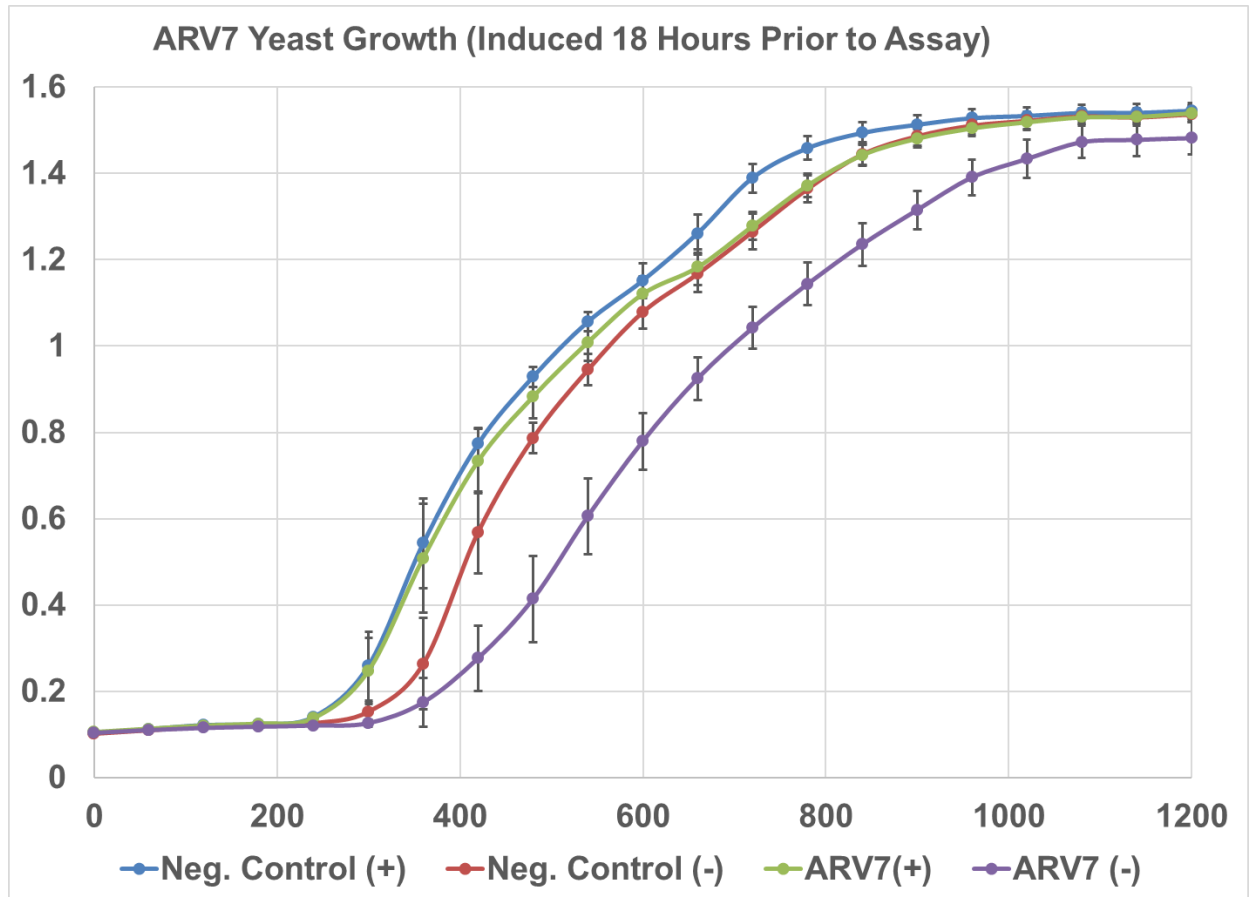

**Appendix Figure S4: Expression of AR-V7 generated a slight growth defect on the yeast strain.**

The inducible *S. pombe* strain expressing an HA-tagged AR-V7 fusion protein was integrated under the control of the *nmt1* thiamine-repressible promoter. Growth curve analysis was completed in the presence (+) and absence of thiamine(-). Details of the procedure can be found in Wiley et al., 2014.

## Network Stats

|                               |                                                                                              |
|-------------------------------|----------------------------------------------------------------------------------------------|
| number of nodes: 273          | expected number of edges: 209                                                                |
| number of edges: 358          | PPI enrichment p-value: 0                                                                    |
| average node degree: 2.62     | <i>your network has significantly more interactions than expected (what does that mean?)</i> |
| clustering coefficient: 0.876 |                                                                                              |

## Functional enrichments in your network

## Biological Process (GO)

| pathway ID | pathway description                                                 | count in network | false discovery rate |
|------------|---------------------------------------------------------------------|------------------|----------------------|
| GO:0070972 | protein localization to endoplasmic reticulum                       | 25               | 1.24e-17             |
| GO:0000184 | nuclear-transcribed mRNA catabolic process, nonsense-mediated decay | 23               | 7.77e-17             |
| GO:0000956 | nuclear-transcribed mRNA catabolic process                          | 26               | 1.73e-16             |
| GO:0006614 | SRP-dependent cotranslational protein targeting to membrane         | 21               | 1.94e-15             |
| GO:0019083 | viral transcription                                                 | 21               | 3.29e-15             |
|            |                                                                     |                  | (more ...)           |

## Molecular Function (GO)

| pathway ID | pathway description                              | count in network | false discovery rate |
|------------|--------------------------------------------------|------------------|----------------------|
| GO:0003735 | structural constituent of ribosome               | 15               | 1.48e-07             |
| GO:0003824 | catalytic activity                               | 112              | 1.48e-07             |
| GO:0005342 | organic acid transmembrane transporter activity  | 14               | 1.48e-07             |
| GO:0008514 | organic anion transmembrane transporter activity | 16               | 1.48e-07             |
| GO:0008509 | anion transmembrane transporter activity         | 18               | 8.06e-07             |
|            |                                                  |                  | (more ...)           |

## Cellular Component (GO)

| pathway ID | pathway description               | count in network | false discovery rate |
|------------|-----------------------------------|------------------|----------------------|
| GO:0022626 | cytosolic ribosome                | 22               | 5.51e-19             |
| GO:0044445 | cytosolic part                    | 24               | 3.47e-15             |
| GO:0044391 | ribosomal subunit                 | 21               | 1.86e-14             |
| GO:0044422 | organelle part                    | 160              | 2.3e-13              |
| GO:0022625 | cytosolic large ribosomal subunit | 14               | 2.95e-13             |
|            |                                   |                  | (more ...)           |

## KEGG Pathways

| pathway ID | pathway description  | count in network | false discovery rate |
|------------|----------------------|------------------|----------------------|
| 03010      | Ribosome             | 21               | 9.76e-15             |
| 04114      | Oocyte meiosis       | 15               | 1.41e-09             |
| 04110      | Cell cycle           | 15               | 7.54e-09             |
| 05203      | Viral carcinogenesis | 13               | 7.23e-05             |
| 05034      | Alcoholism           | 11               | 0.000135             |
|            |                      |                  | (more ...)           |

## PFAM Protein Domains

| pathway ID | pathway description              | count in network | false discovery rate |
|------------|----------------------------------|------------------|----------------------|
| PF00125    | Core histone H2A/H2B/H3/H4       | 12               | 3.11e-08             |
| PF00244    | 14-3-3 protein                   | 6                | 5.53e-08             |
| PF00149    | Calcineurin-like phosphoesterase | 4                | 0.0372               |
| PF07690    | Major Facilitator Superfamily    | 4                | 0.0372               |
| PF00481    | Protein phosphatase 2C           | 3                | 0.0442               |
|            |                                  |                  | (more ...)           |

## INTERPRO Protein Domains and Features

| pathway ID | pathway description            | count in network | false discovery rate |
|------------|--------------------------------|------------------|----------------------|
| IPR002119  | Histone H2A                    | 12               | 1.9e-13              |
| IPR007125  | Histone H2A/H2B/H3             | 12               | 3.32e-08             |
| IPR000308  | 14-3-3 protein                 | 6                | 4.73e-08             |
| IPR023409  | 14-3-3 protein, conserved site | 6                | 4.73e-08             |
| IPR023410  | 14-3-3 domain                  | 6                | 4.73e-08             |
|            |                                |                  | (more ...)           |

Appendix Figure S5: Network analysis of AR-V7 interactome was obtained using STRING of hits identified by SGA screening.

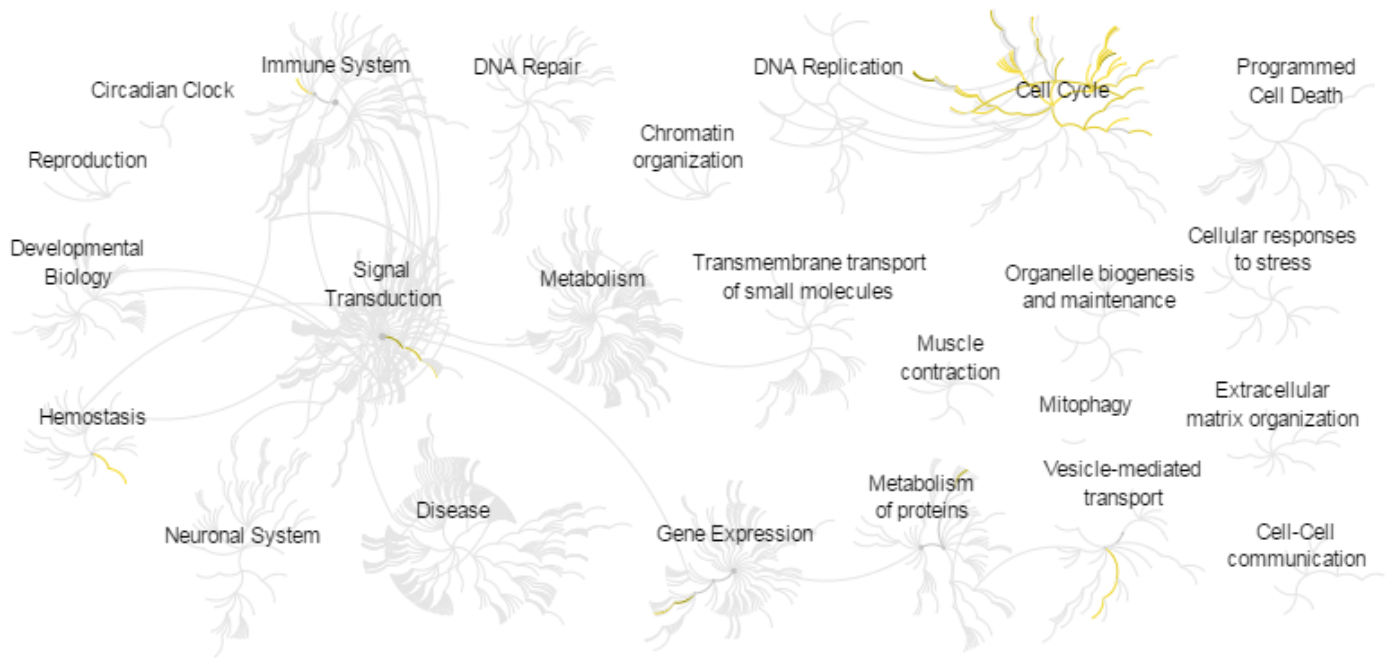

**Appendix Figure S6: Pathway analysis of the seven gene set reveals a strong association to cell cycle.** The analysis was performed using <https://reactome.org>.

**A**

## Expression levels in human CRPC bone mets

## Appendix Figure S7

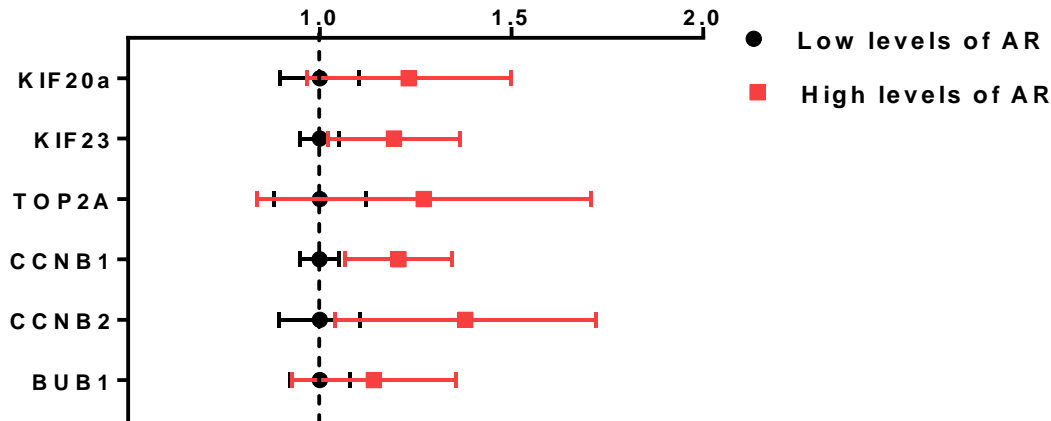**B**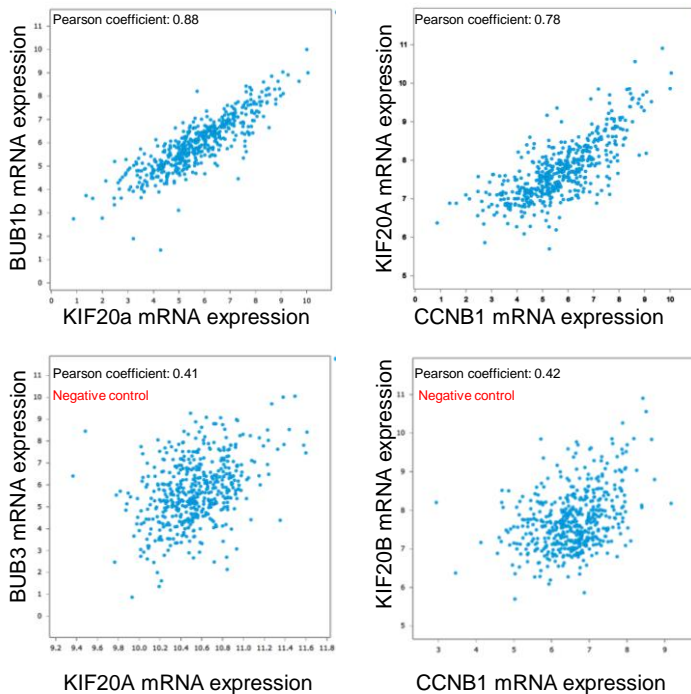

| Gene 1 | Gene 2 | Pearson's Correlation | Gene 1 | Gene 2 | Pearson's Correlation |
|--------|--------|-----------------------|--------|--------|-----------------------|
| KIF20A | KIF23  | 0.90                  | TOP2A  | CCNB1  | 0.75                  |
| KIF20A | TOP2A  | 0.87                  | TOP2A  | CCNB2  | 0.66                  |
| KIF20A | CCNB1  | 0.78                  | TOP2A  | BUB1   | 0.92                  |
| KIF20A | CCNB2  | 0.70                  | TOP2A  | BUB1B  | 0.85                  |
| KIF20A | BUB1   | 0.86                  | CCNB1  | CCNB2  | 0.68                  |
| KIF20A | BUB1B  | 0.88                  | CCNB1  | BUB1   | 0.80                  |
| KIF23  | TOP2A  | 0.92                  | CCNB1  | BUB1B  | 0.74                  |
| KIF23  | CCNB1  | 0.80                  | CCNB2  | BUB1   | 0.70                  |
| KIF23  | CCNB2  | 0.71                  | CCNB2  | BUB1B  | 0.70                  |
| KIF23  | BUB1   | 0.92                  | BUB1   | BUB1B  | 0.88                  |
| KIF23  | BUB1B  | 0.88                  |        |        |                       |

**Appendix Figure S7: The seven genes are co-expressed in human PC samples, but do not correlate with full length AR expression levels.**

**(A)** Hornberg *et al.*, 2011 gene expression profiling array data was analyzed to determine the expression levels of the seven genes in human CRPC bone metastases, grouped by their relative levels of AR (High-levels of AR (top quartile) or lower levels of AR (quartiles 1-3)). Data are plotted as the mean  $\pm$  s.e.m.. Non-parametric Mann-Whitney test was performed (two-tailed). Note that BUB1B expression was not measured in these microarrays.

**(B)** The left panels (top graphs) show sample pairwise comparisons (KIF20a & BUB1B; CCNB1 & KIF20a mRNAs) in human PC samples obtained from the TCGA Provisional Adenocarcinoma dataset, where log<sub>2</sub> transformation was applied (n= 499). Analysis of BUB3 and KIF20b, which are not members of the seven gene set, were compared with KIF20A and CCNB1, respectively, as negative controls. The table summarizes the Pearson correlation values between the expression levels of each pair of the seven genes.



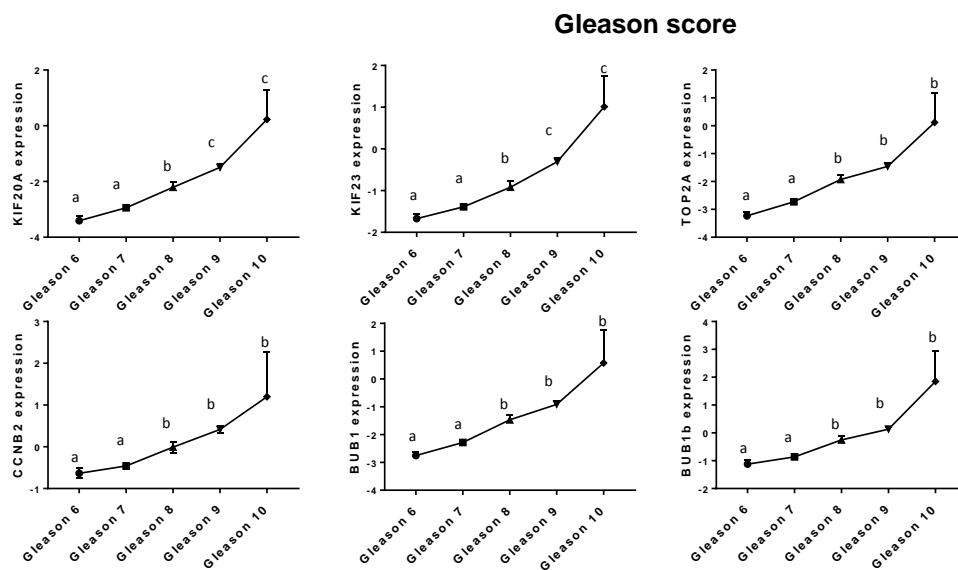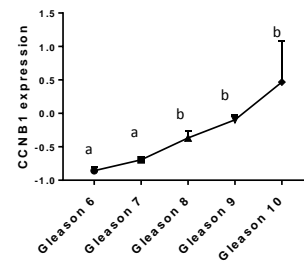

a,b,c, indicate statistically significant differences at p value = 0.05

B

## Clinical stage

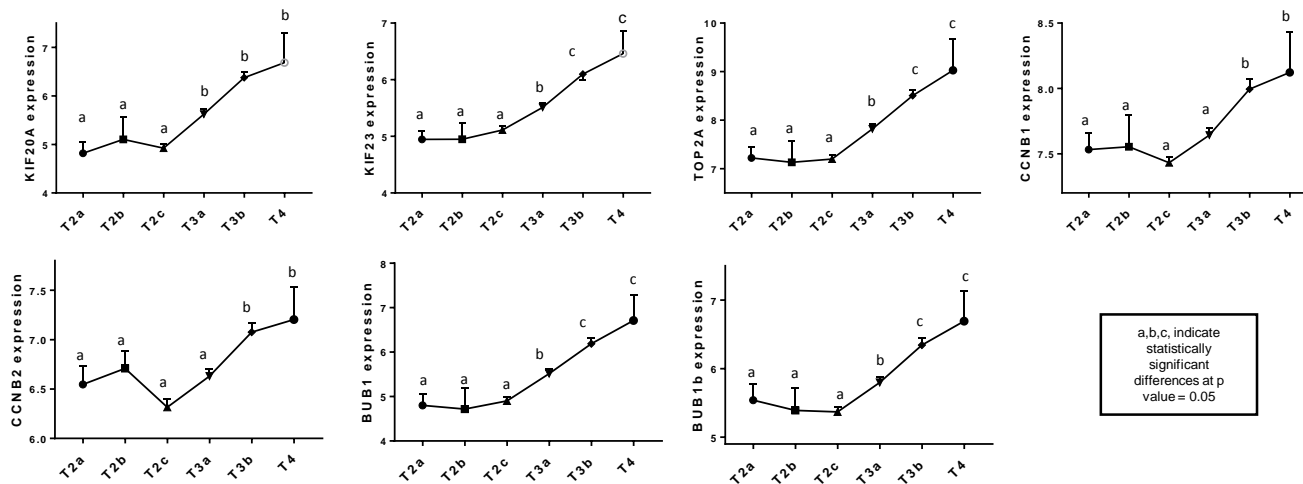

a,b,c, indicate statistically significant differences at p value = 0.05

C

## Gene expression levels in patient samples

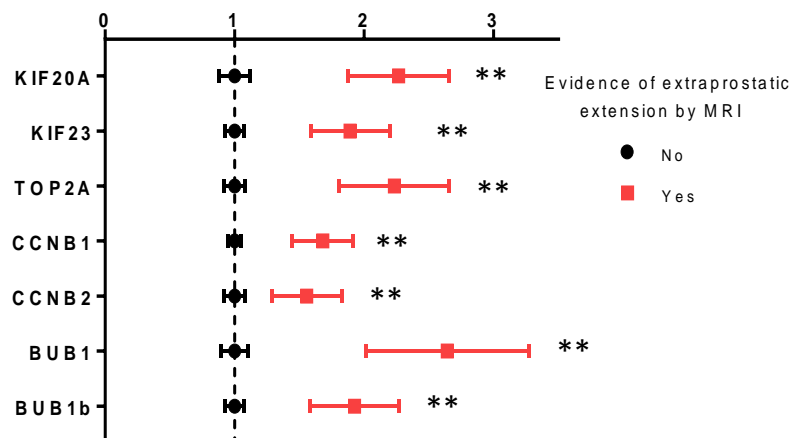

**Appendix Figure S8: Elevated expression of the seven gene set is associated with higher Gleason scores and other adverse indicators in human PC samples.**

**(A), (B)** PC patient RNA-SEQ data from the Prostate Adenocarcinoma TCGA provisional dataset (N = 465) were used to plot the log<sub>2</sub> based transformed mean + s.e.m. of the gene expression levels for each PC sample according to each patient's Gleason score and clinical stage. Kruskal-Wallis (P value < 0.0001 for all panels, two-tailed) and Dunn's multiple comparisons test were performed. Different letters (a,b,c) denote statistically significant differences at a p value < 0.05.

**(C)** PC patient RNA-seq data from the Prostate Adenocarcinoma TCGA provisional were analyzed to compare gene expression levels with the presence or absence of evidence for extraprostatic extension by MRI analysis (an adverse prognostic indicator). Data shows the mean ± s.e.m., Unpaired t-test with Welch's correction were performed (two-tailed). \*\* Significant at a p value < 0.05.

■ Cases without mRNA upregulation

■ Cases with mRNA upregulation

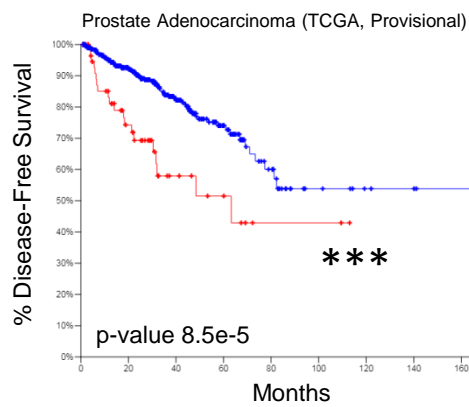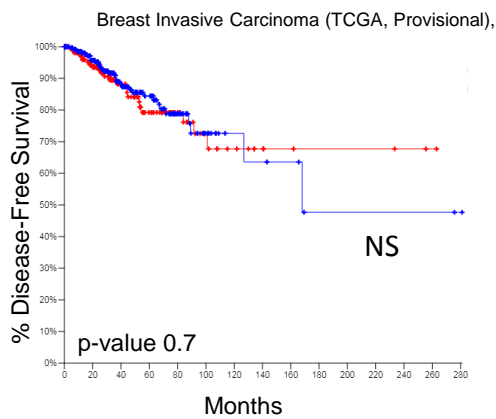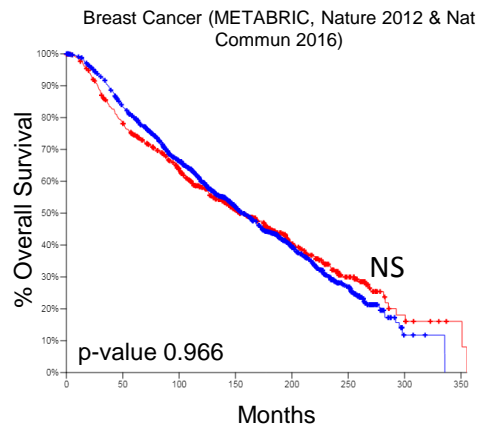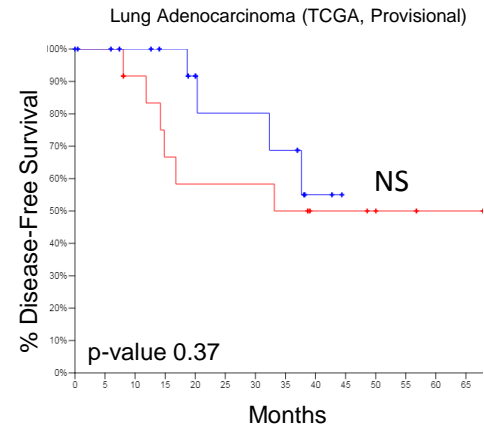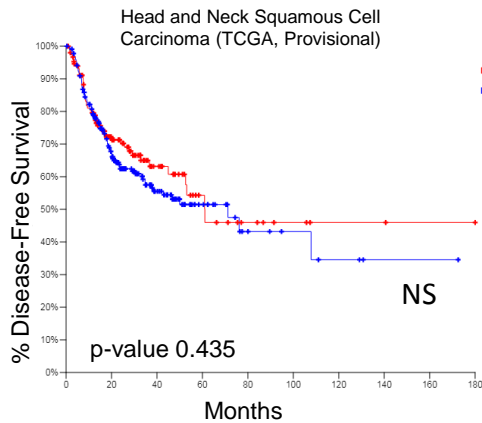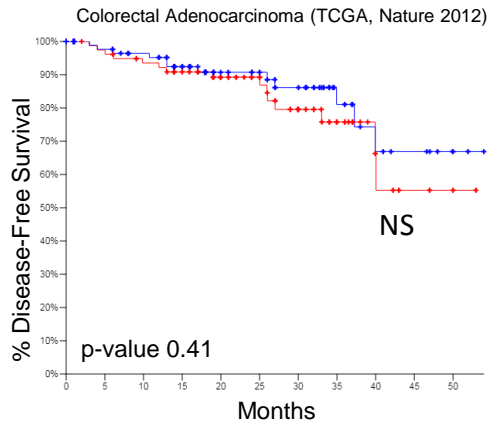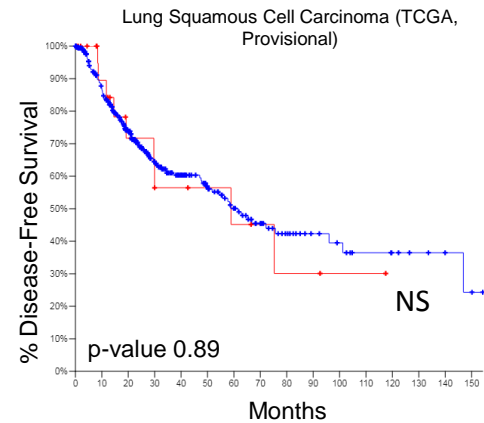

**Appendix Figure S9: The seven gene set does not have prognostic value in several other types of cancer.** The Kaplan-Meier curves for Disease-Free Survival were built with cbioportal.org, using the following datasets: Prostate Cancer Adenocarcinoma (TCGA, Provisional), Breast Invasive Carcinoma (TCGA, Provisional), Breast Cancer (METABRIC, Nature 2012 & Nat Commun 2016), Lung Adenocarcinoma (TCGA, Provisional), Head and Neck Squamous Cell Carcinoma (TCGA, Provisional), Colorectal Adenocarcinoma (TCGA, Nature 2012), and Lung Squamous Cell Carcinoma (TCGA, Provisional). The blue curve denotes cases with normal expression of the gene set, and red represents cases where the mRNA levels of one or more of the seven genes were upregulated (z-score threshold  $\pm 1.5$ ).

 Vehicle  
 Androgen R1881

### Androgen dependent PC cell line

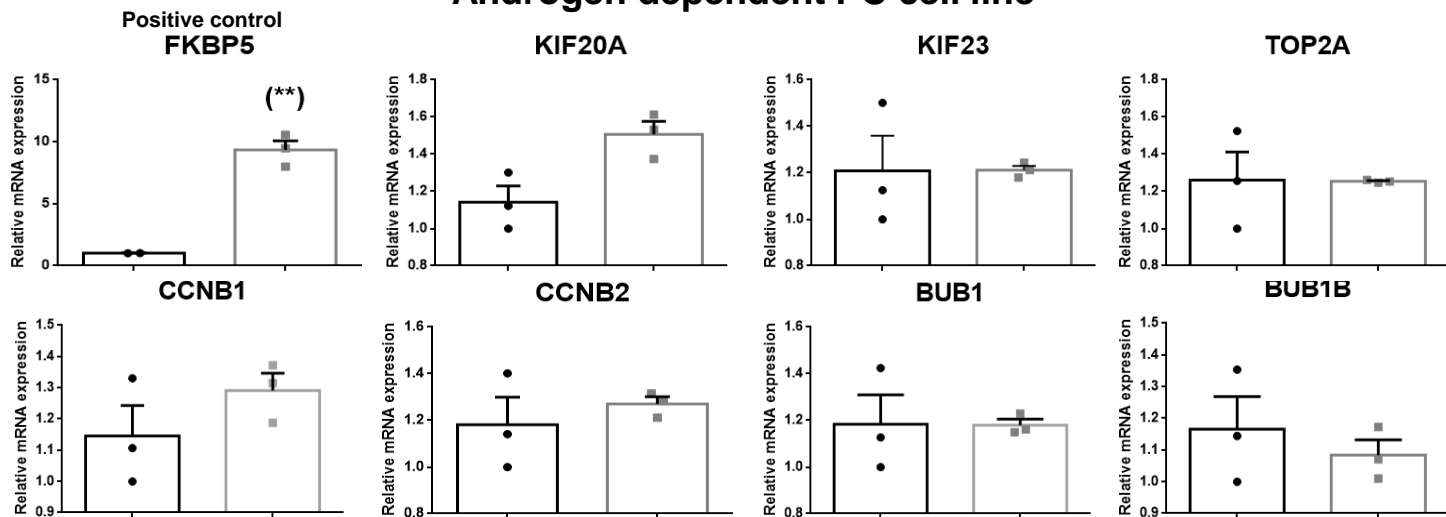

### CRPC cell line 22Rv1

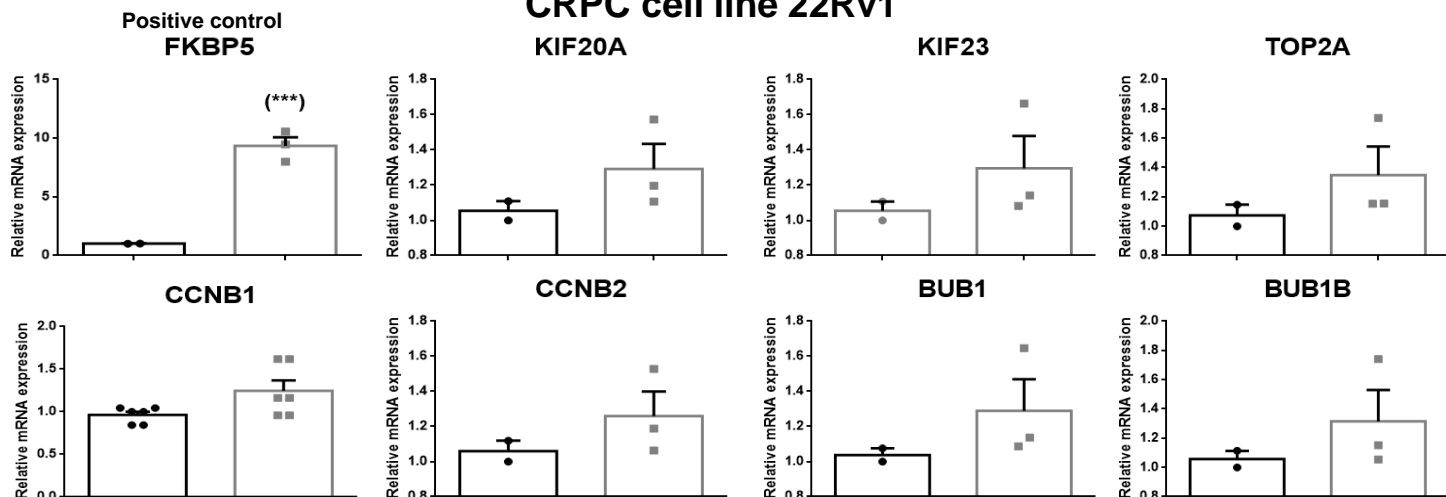

### CRPC cell line C4-2B

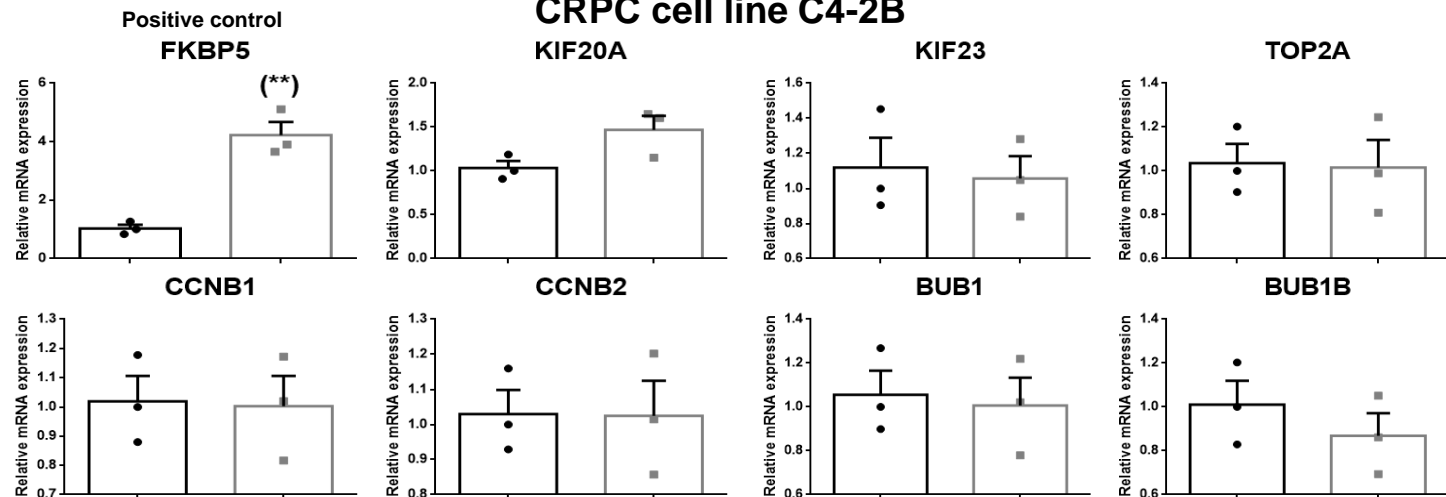

**Appendix Figure S10: None of the seven genes are regulated by ligand-activated full length AR.**

LNCaP, 22Rv1, and C4-2B cells were seeded and 24 hours later were rinsed twice with PBS and incubated in serum free media for one hour. The cells were then incubated in media containing vehicle or 0.1 nM of R1881 for 16 hours prior to harvesting them for RNA extraction and qPCR analysis. FKBP5 was used as a positive control. Data represent one to two independent experiments, performed in biological triplicates, showing the mean  $\pm$  s.e.m., and normalized to vehicle control. Significant at a p value, \*\* p value < 0.01, \*\*\* p value < 0.001.

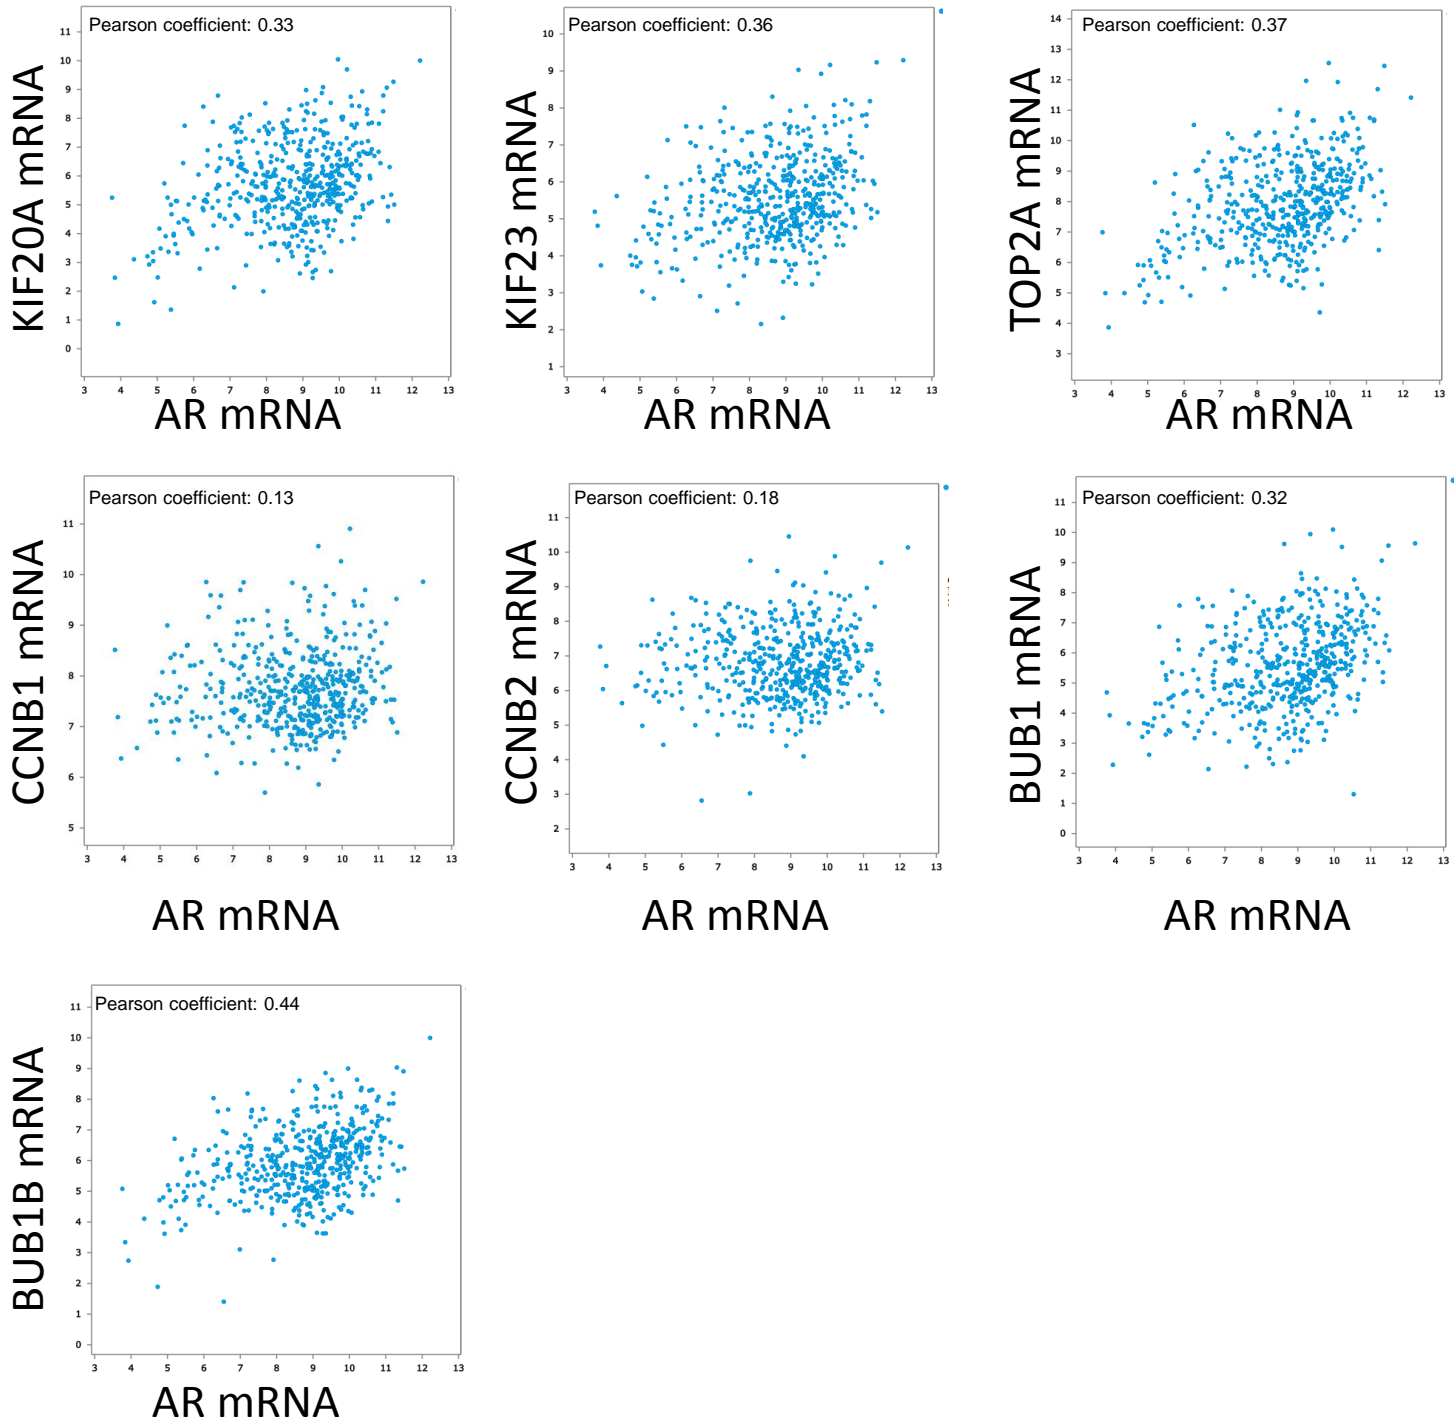

**Appendix Figure S11: The seven gene set is not associated to full length AR levels in human samples.** The graphs show pairwise comparisons of the mRNA levels of each of the seven genes with the mRNA levels of AR in human PC samples obtained from the TCGA Provisional Adenocarcinoma dataset, where log<sub>2</sub> transformation was applied.

**A**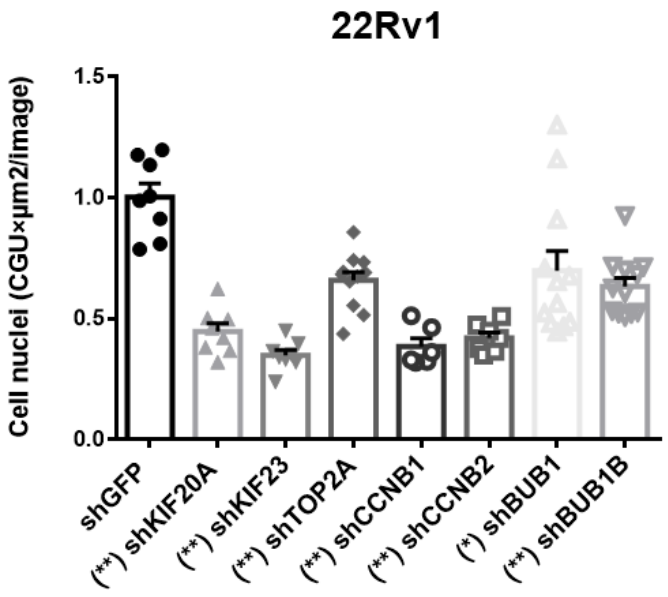**B**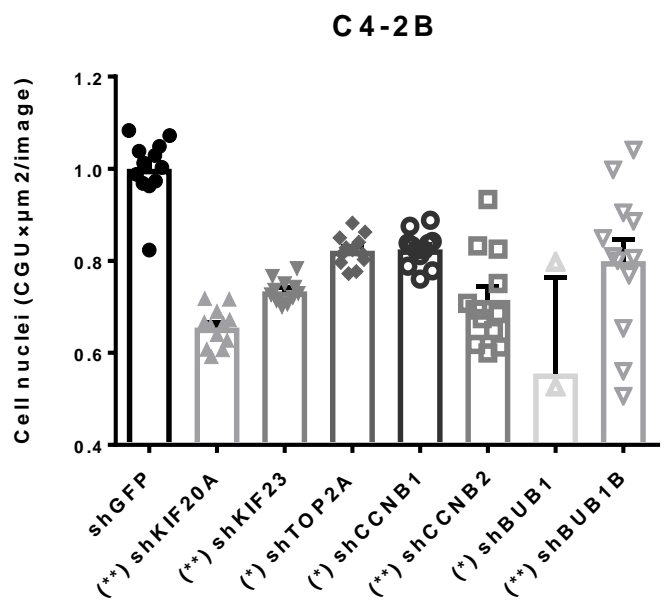**Appendix Figure S12**

**Appendix Figure S12: Stable depletion of the expression of each of the seven genes reduces CRPC cell proliferation in two different cell lines.**

(A), (B) Cell proliferation was examined in the CRPC cell lines 22Rv1 and C4-2B following individual depletion of mRNAs for the seven genes or shGFP controls. shRNA constructs against the 3'UTR of each gene were used. Cell number was measured using a non-perturbing nuclear-restricted dye and quantified after 72 hours using Incucyte Zoom System. Data shown are mean  $\pm$  s.e.m. of 8 to 12 replicates normalized to their shGFP control. Kruskal-Wallis test ( $p$  value  $< 0.0001$ , two-tailed) and Dunn's multiple comparisons test were performed.

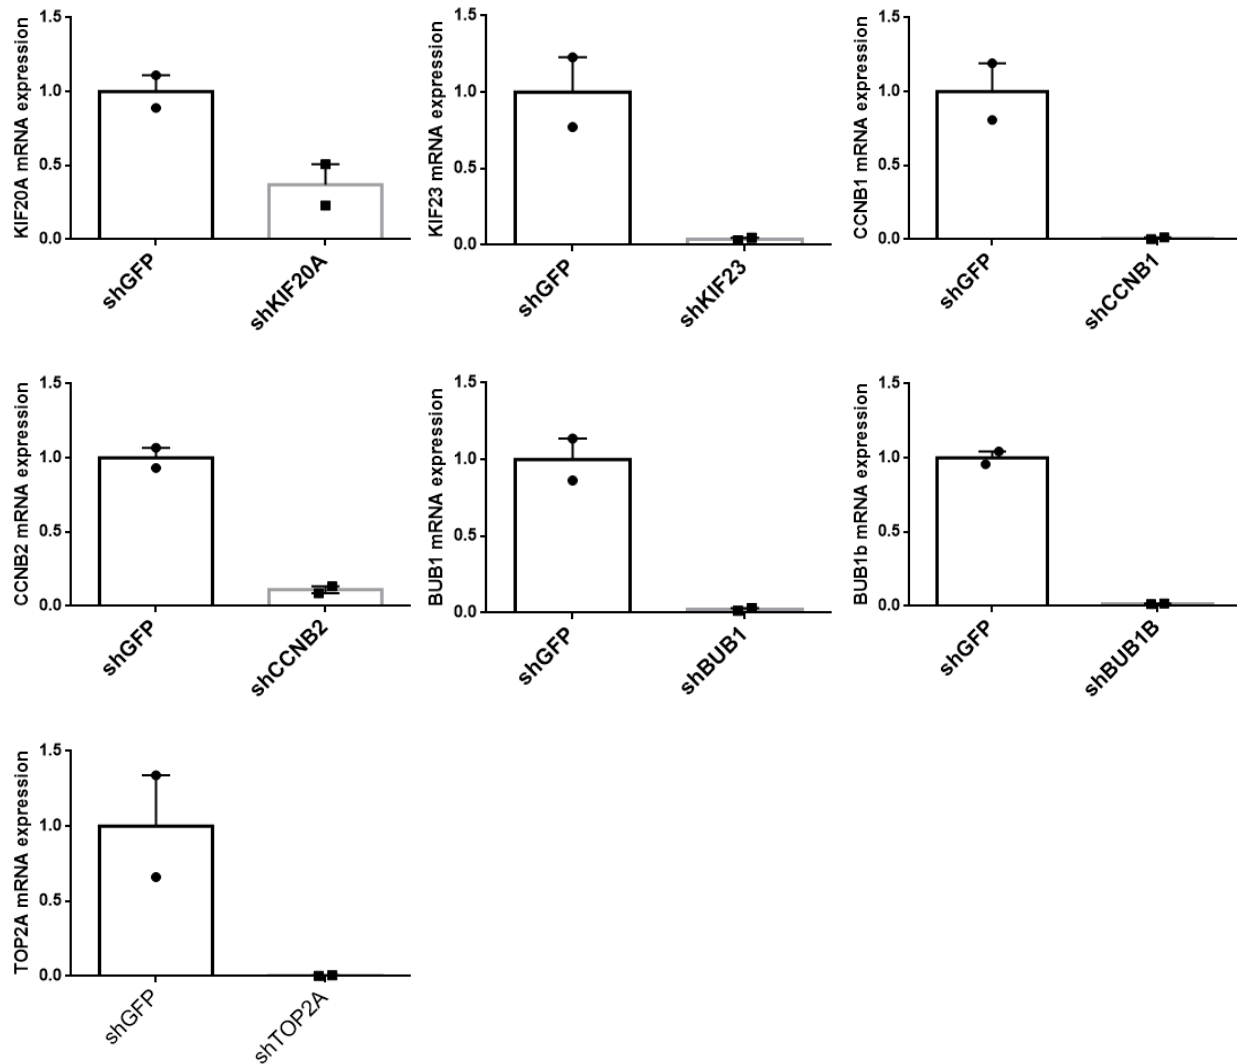

**Appendix Figure S13: Analysis of efficacy of shRNA-mediated depletion of the expression of each of the seven genes.**

22Rv1 cells were stably transduced with shGFP (as a control) or shRNAs targeted to each of the seven genes. RT-qPCR analysis was performed in duplicate, and the results were normalized to GAPDH mRNA levels, and then to the respective shGFP controls. The median with 95% CI is shown.



**A**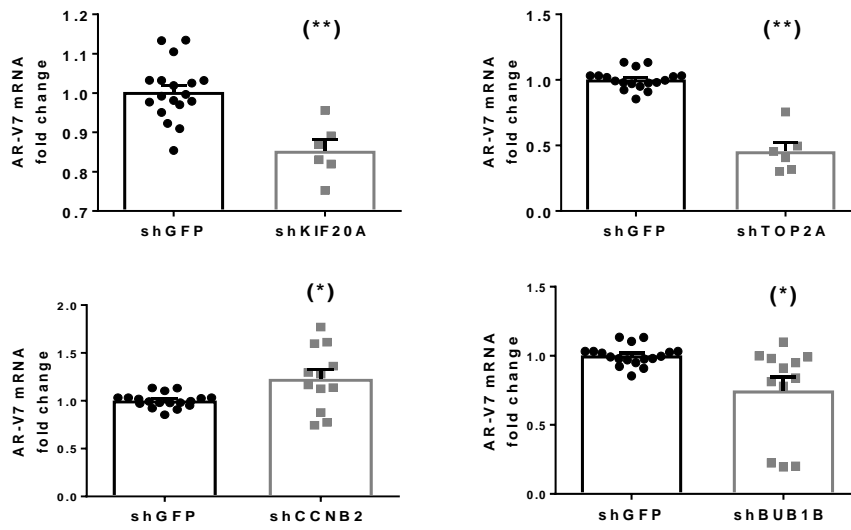**B**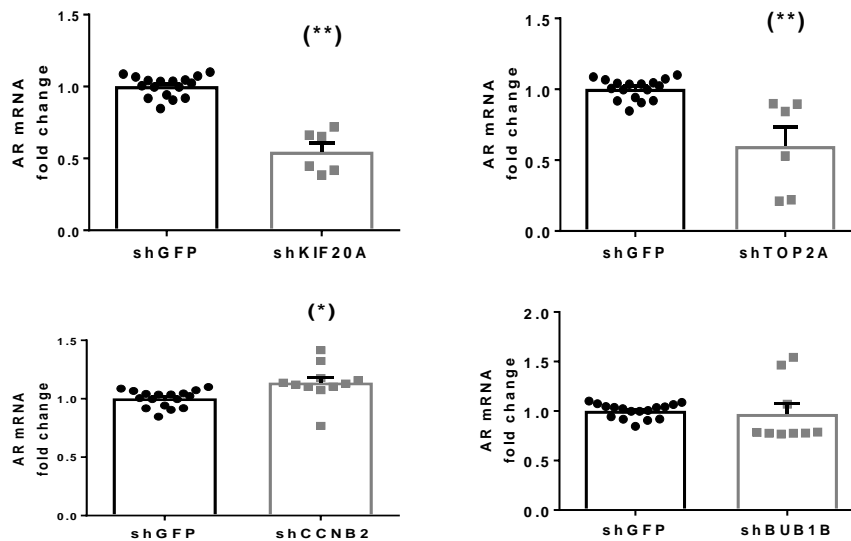

**Appendix Figure S14: Members of the gene set modify AR-V7 and full length AR expression levels.**

**(A), (B)** 22Rv1 cells were stably transduced with shGFP (as a control) or shRNAs targeted to individual members of the seven genes. Cells were kept in 2% CSS. mRNA was harvested and RT-qPCR analysis was performed to measure AR-V7 or full length AR mRNA levels, in triplicates two to four independent times. The results were normalized to GAPDH mRNA levels, and then to the respective shGFP controls. Data shows the mean  $\pm$  s.e.m. Unpaired t-test with Welch's correction were performed (two-tailed). Significant at a p value, \* p value < 0.05, \*\* p value < 0.01.
